# Supplementary material for: Periodontitis and the risk of all-cause and cause-specific mortality among individuals with osteoarthritis in U.S.: A population-based cohort study
Source: Research Square preprint supplement (doi:10.21203/rs.3.rs-6746901/v1), 2025-07-18
Supplement: Supplementary file 1 [file 1330baff52beafb6997a09dc.docx]

**Supplementary File 2**

**Periodontitis and the risk of all-cause and cause-specific mortality among individuals with osteoarthritis in U.S.: A population-based cohort study**

**Table of Contents**

1. Supplementary Tables and Figures title................................................................2
2. Supplementary Tables.............................................................................................3
3. Supplementary Figures ........................................................................................18

# Supplementary Tables and Figures title

**Supplementary Table 1.** Details regarding the missing rate and multiple imputation methods of covariates

**Supplementary Table 2.** Socioeconomic characteristics of participants with osteoarthritis according to periodontal status

**Supplementary Table 3.** Event Numbers and crude absolute mortality for all-cause and cause-specific mortality in participants with osteoarthritis

**Supplementary Table 4.** Stratified analyses of the associations between periodontitis and all-cause and cause-specific mortality among participates with osteoarthritis

**Supplementary Table 5.** The results of the sensitivity analysis of duration> 2 years

**Supplementary Table 6.** The results of the sensitivity analysis of omitted participants with cancer or CVD

**Supplementary Table 7.** Baseline characteristics of participants of original data with osteoarthritis according to periodontal status

**Supplementary Table 8.** The results of the sensitivity analysis of original data without multiple interpolation

**Supplementary Table 9.** Baseline characteristics of participants of complete data with osteoarthritis according to periodontal status

**Supplementary Table 10.** The results of the sensitivity analysis of complete data without multiple interpolation

**Supplementary Table 11.** The results of the sensitivity analysis of participants only with major osteoarthritis

# Supplementary Figures

**Supplementary Fig. 1.** Flowchart of the study participants

**Supplementary Fig. 2.** The results of directed acyclic graphs (DAGs)

**Supplementary Fig. 3.** Details of the socioeconomic status (SES) classification using latent class analysis

# Supplementary Tables:

| **Supplementary Table 1.** Details regarding the missing rate and multiple imputation methods of covariates | | | |
| --- | --- | --- | --- |
| Covariate | Variable type | defect rate, % | imputation method* |
| Age | continuous | No missing values | / |
| Gender | categorical | No missing values | / |
| Race/ ethnicity | categorical | No missing values | / |
| Socioeconomic index | categorical | 1.362 | BMLR |
| Poverty income ratio | categorical | 1.042 | BMLR |
| Health insurance | categorical | 6.731 | BMLR |
| Education levels | categorical | 0.641 | BMLR |
| Smoking status | categorical | 0.321 | / |
| Drinking status | categorical | No missing values | BMLR |
| Physical status | categorical | 2.244 | / |
| Healthy eating index | categorical | No missing values | BMLR |
| Body mass index, kg/m2 | continuous | 1.763 | PMM |
| Hypertension | categorical | 0.641 | / |
| Diabetes mellitus | categorical | No missing values | / |

*PMM was used to continuous covariates and BMLR was used to categorical covariates.

PMM:predicting mean matching; BMLR:Bayesian multivariate logistic regression

| **Supplementary Table 2.** Socioeconomic characteristics of participants with major osteoarthritis according to periodontal status | | | | | | | |
| --- | --- | --- | --- | --- | --- | --- | --- |
|  |  |  | Periodontal status | | | |  |
|  | Over all | | No/ Mild periodontitis | | Moderate/ Severe periodontitis | |  |
| Characteristics | Mean/ %* | SE* | Mean/ % | SE | Mean/ % | SE | P† |
| No. (Unweighted) | 1248 | | 740 | | 508 | |  |
| No. (Weighted) | 13,643,072 | | 4,926,496 | | 8,716,576 | |  |
| Socioeconomic index, % | |  |  |  |  |  | 0.598 |
| Unemployment | 15.6 | 1.4 | 15.4 | 1.7 | 15.9 | 2.3 |  |
| Lower | 60 | 1.7 | 59 | 2.2 | 61.8 | 2.7 |  |
| Upper | 24.4 | 1.5 | 25.6 | 1.8 | 22.3 | 2.9 |  |
| Poverty income ratio, % | |  |  |  |  |  | 0.030 |
| <1.00 | 8.1 | 1.1 | 7.3 | 1.2 | 9.5 | 1.6 |  |
| 1.00-3.99 | 50.6 | 1.8 | 48.2 | 2.4 | 54.8 | 2.9 |  |
| ≥4.00 | 41.3 | 2 | 44.4 | 2.5 | 35.7 | 2.9 |  |
| Health insurance, % | |  |  |  |  |  | 0.269 |
| No insurance | 6 | 0.9 | 5.8 | 1.1 | 6.3 | 1.6 |  |
| Public insurance only | 20.5 | 1.7 | 18.8 | 1.7 | 23.6 | 3.1 |  |
| Private insurance | 73.5 | 1.9 | 75.4 | 1.8 | 70.1 | 3.4 |  |
| Education levels, % | |  |  |  |  |  | 0.012 |
| Less than high school | 18.1 | 1.4 | 14.8 | 1.7 | 24.1 | 2.7 |  |
| High school or equivalent | 23.1 | 1.4 | 25.3 | 2.3 | 19.1 | 2.4 |  |
| Hispanic | 4.8 | 0.8 | 4.5 | 0.8 | 5.3 | 1.3 |  |
| Socioeconomic Status, % | |  |  |  |  |  | 0.140 |
| Low | 11.6 | 1.3 | 10.5 | 1.3 | 13.5 | 2.2 |  |
| Medium | 55.4 | 1.9 | 54.2 | 2.3 | 57.3 | 3 |  |
| High | 33.1 | 1.9 | 35.3 | 2.3 | 29.2 | 3.1 |  |
| * Normally distributed continuous variables are described as means ± SEs; Categorical variables are presented as numbers (percentages). All estimates accounted for complex survey designs.  † The t test was used for continuous variables and the χ test for categorical variables. | | | | | | | |

‡ Income, education level, occupation, and insurance was integrated into SES (Socioeconomic Status), to better measure the economic and social status of participants. Latent class analysis was used to generate SES, which was ultimately divided into three mutually exclusive latent classes: high, medium, and low level.

| **Supplementary Table 3.** Event Numbers and crude absolute mortality for all-cause and cause-specific mortality in participants with osteoarthritis | | | | |
| --- | --- | --- | --- | --- |
| Outcome | No/Mild periodontitis | | Moderate/Severe periodontitis | |
| Events, n/N | Incidence Rate (95% CI) | Events, n/N | Incidence Rate (95% CI) |
| All  cause | 1,994,296/  4,926,496 | 18.17  (18.15-18.19) | 2,356,381/  8,716,576 | 32.02 (31.97-32.06) |
| CVD-  related | 573,816/  4,926,496 | 5.58 (5.57-5.59) | 723,976/  8,716,576 | 9.21 (9.19-9.24) |
| Cancer-  related | 389,289/  4,926,496 | 3.97 (3.95-3.98) | 514,286/  8,716,576 | 6.26 (6.24-6.28) |

CVD: cardiovascular disease.

| **Supplementary Table 4.** Stratified analyses of the associations between periodontitis and all-cause and cause-specific mortality among participates with osteoarthritis | | | |
| --- | --- | --- | --- |
|  | Periodontal status | | |
|  | No/Mild periodontitis | Moderate/Severe periodontitis | P |
| All cause* |  |  |  |
| Age <45† | 1.00 [Reference] | 1.13 (0.78, 1.63) | 0.519 |
| Age ≥45 | 1.00 [Reference] | 1.56 (0.91, 2.66) | 0.106 |
| Male | 1.00 [Reference] | 0.90 (0.61, 1.34) | 0.605 |
| Female | 1.00 [Reference] | 1.60 (1.19, 2.16) | 0.002 |
| CVD-related* |  |  |  |
| Age <45 | 1.00 [Reference] | 0.94 (0.54, 1.63) | 0.822 |
| Age ≥45 | 1.00 [Reference] | 1.52 (0.56, 4.13) | 0.411 |
| Male | 1.00 [Reference] | 0.50 (0.26, 0.98) | 0.044 |
| Female | 1.00 [Reference] | 1.89 (1.18, 3.02) | 0.008 |
| Cancer-related* |  |  |  |
| Age <45 | 1.00 [Reference] | 1.13 (0.52, 2.47) | 0.75 |
| Age ≥45 | 1.00 [Reference] | 1.63 (0.71, 3.75) | 0.247 |
| Male | 1.00 [Reference] | 1.68 (0.61, 4.63) | 0.312 |
| Female | 1.00 [Reference] | 0.96 (0.50, 1.87) | 0.914 |

* All-cause mortality used Cox proportional hazards model, and cause-specific mortality used competing risk model. All the models were adjusted for age (30-44, 45-64 or ≥65 years old), gender (male and female), race/ethnicity (non-Hispanic white, non-Hispanic black, Hispanic, and other races), SES (high, medium, and low level), alcohol consumption (nondrinkers, heavier drinkers, and light/moderate drinkers), [physical activity](https://www.so.com/link?m=b+1HoIQW0UKZm8qFAWepRClkrqA6j1l3Q2WRNa0GtuJOspq+PCyCcZSh+ozoV3S6pIk1EvQ0lmsleWi7eNLbwCxevJO4PhfpV7mYD1UegNClNGKEskLTr8I3mj++dV2rbRhtxTvPLo+4=) status (inactive, insufficient, recommended), BMI status (body mass index, normal, overweight, and obesity), HTN status (hypertension, yes or no), HPL (hyperlipidemia status, yes or no), and diabetes status (yes or no). Stratified variables are excluded from the covariates of the models included in the group.

†When stratified analyses are performed, the covariates for constructing the model remain grouped as described above and simplifying the grouped variables into two groups: Age (<45, ≥45 years old), Gender (male and female)

| **Supplementary Table 5.** The results of the sensitivity analysis of duration> 2 years | | | |
| --- | --- | --- | --- |
|  | Periodontal status | |  |
|  | No/ Mild periodontitis | Moderate/ Severe periodontitis | P |
| All cause* |  |  |  |
| Deaths/total (Unweighted) | 249/719 | 253/489 |  |
| Deaths/total (Weighted) | 1,871,660/4,803,860 | 2,216,749/8,576,944 |  |
| Model 1† | 1.00 [Reference] | 1.96 (1.54, 2.50) | <0.001 |
| Model 2‡ | 1.00 [Reference] | 1.34 (1.04, 1.73) | 0.025 |
| Model 3§ | 1.00 [Reference] | 1.31 (1.01, 1.70) | 0.040 |
| Model 4¶ | 1.00 [Reference] | 1.34 (1.02, 1.77) | 0.036 |
| CVD-related |  |  |  |
| Deaths/total (Unweighted) | 91/719 | 84/489 |  |
| Deaths/total (Weighted) | 492,618/4,803,860 | 672,649/8,576,944 |  |
| Model 1 | 1.00 [Reference] | 1.71 (1.17, 2.49) | 0.006 |
| Model 2 | 1.00 [Reference] | 1.08 (0.73, 1.59) | 0.709 |
| Model 3 | 1.00 [Reference] | 1.07 (0.73, 1.59) | 0.721 |
| Model 4 | 1.00 [Reference] | 1.05 (0.70, 1.57) | 0.831 |
| Cancer-related |  |  |  |
| Deaths/total (Unweighted) | 50/719 | 46/489 |  |
| Deaths/total (Weighted) | 364,400/4,803,860 | 464,599/8,576,944 |  |
| Model 1 | 1.00 [Reference] | 1.81 (1.06, 3.06) | 0.028 |
| Model 2 | 1.00 [Reference] | 1.35 (0.79, 2.33) | 0.277 |
| Model 3 | 1.00 [Reference] | 1.26 (0.71, 2.25) | 0.428 |
| Model 4 | 1.00 [Reference] | 1.42 (0.77, 2.64) | 0.261 |
| * All-cause mortality used Cox proportional hazards model, and cause-specific mortality used competing risk model.  † Model 1 was univariate analysis.  ‡ Model 2 included age (30-44, 45-64 or ≥65 years old), gender, race/ethnicity (non-Hispanic white, non-Hispanic black, Hispanic or other races), SES (Socioeconomic Status, low, middle, high).  § Model 3 additionally included smoking habit (never smokers, former or current smokers), alcohol consumption (nondrinker, heavier drinker, or light/ moderate drinker), [physical activity](https://www.so.com/link?m=b+1HoIQW0UKZm8qFAWepRClkrqA6j1l3Q2WRNa0GtuJOspq+PCyCcZSh+ozoV3S6pIk1EvQ0lmsleWi7eNLbwCxevJO4PhfpV7mYD1UegNClNGKEskLTr8I3mj++dV2rbRhtxTvPLo+4=) status (inactive, insufficient, recommended) and BMI status (body measure index, normal (≤24.9 [kg/m2]), overweight (25.0-29.9 [kg/m2]), and obesity (≥30.0 [kg/m2]) based on Model 2.  ¶ Model 4 was further adjusted for HTN status (hypertension, yes or no) , HPL (hyperlipidemia, yes or no), and diabetes status (yes or no) based on Model 3. | | | |

| **Supplementary Table 6.** The results of the sensitivity analysis of omitted participants with cancer or CVD | | | |
| --- | --- | --- | --- |
|  | Periodontal status | |  |
|  | No/ Mild periodontitis | Moderate/ Severe periodontitis | P |
| All cause* |  |  |  |
| Deaths/total (Unweighted) | 249/719 | 253/489 |  |
| Deaths/total (Weighted) | 1,871,660/4,803,860 | 2,216,749/8,576,944 |  |
| Model 1† | 1.00 [Reference] | 1.96 (1.54, 2.50) | <0.001 |
| Model 2‡ | 1.00 [Reference] | 1.34 (1.04, 1.73) | 0.025 |
| Model 3§ | 1.00 [Reference] | 1.31 (1.01, 1.70) | 0.040 |
| Model 4¶ | 1.00 [Reference] | 1.34 (1.02, 1.77) | 0.036 |
| CVD-related |  |  |  |
| Deaths/total (Unweighted) | 91/719 | 84/489 |  |
| Deaths/total (Weighted) | 492,618/4,803,860 | 672,649/8,576,944 |  |
| Model 1 | 1.00 [Reference] | 1.71 (1.17, 2.49) | 0.006 |
| Model 2 | 1.00 [Reference] | 1.08 (0.73, 1.59) | 0.709 |
| Model 3 | 1.00 [Reference] | 1.07 (0.73, 1.59) | 0.721 |
| Model 4 | 1.00 [Reference] | 1.05 (0.70, 1.57) | 0.831 |
| Cancer-related |  |  |  |
| Deaths/total (Unweighted) | 50/719 | 46/489 |  |
| Deaths/total (Weighted) | 364,400/4,803,860 | 464,599/8,576,944 |  |
| Model 1 | 1.00 [Reference] | 1.81 (1.06, 3.06) | 0.028 |
| Model 2 | 1.00 [Reference] | 1.35 (0.79, 2.33) | 0.277 |
| Model 3 | 1.00 [Reference] | 1.26 (0.71, 2.25) | 0.428 |
| Model 4 | 1.00 [Reference] | 1.42 (0.77, 2.64) | 0.261 |
| * All-cause mortality used Cox proportional hazards model, and cause-specific mortality used competing risk model.  † Model 1 was univariate analysis.  ‡ Model 2 included age (30-44, 45-64 or ≥65 years old), gender, race/ethnicity (non-Hispanic white, non-Hispanic black, Hispanic or other races), SES (Socioeconomic Status, low, middle, high) .  § Model 3 additionally included smoking habit (never smokers, former or current smokers), alcohol consumption (nondrinker, heavier drinker, or light/ moderate drinker), [physical activity](https://www.so.com/link?m=b+1HoIQW0UKZm8qFAWepRClkrqA6j1l3Q2WRNa0GtuJOspq+PCyCcZSh+ozoV3S6pIk1EvQ0lmsleWi7eNLbwCxevJO4PhfpV7mYD1UegNClNGKEskLTr8I3mj++dV2rbRhtxTvPLo+4=) status (inactive, insufficient, recommended) and BMI status (body measure index, normal (≤24.9 [kg/m2]), overweight (25.0-29.9 [kg/m2]), and obesity (≥30.0 [kg/m2]) based on Model 2.  ¶ Model 4 was further adjusted for HTN status (hypertension, yes or no), HPL (hyperlipidemia, yes or no), and diabetes status (yes or no) based on Model 3. | | | |

| **Supplementary Table 7.** Baseline characteristics of participants of original data with osteoarthritis according to periodontal status | | | | | | | | | |
| --- | --- | --- | --- | --- | --- | --- | --- | --- | --- |
|  |  | |  | Periodontal status | | | | |  |
|  | Over all | | | No/ Mild periodontitis | | Moderate/ Severe periodontitis | | |  |
| Characteristics | Mean/ %* | | SE* | Mean/ % | SE | Mean/ % | | SE | P† |
| No.(Unweighted) | 1,248 | | | 740 | | 508 | | |  |
| No.(Weighted) | 13,643,072 | | | 4,926,496 | | 8,716,576 | | |  |
| Age (years), mean | 59.8 | 0.4 | | 58 | 0.5 | 62.9 | 0.7 | | <0.001 |
| Age status, % |  |  | |  |  |  |  | | <0.001 |
| <45 | 11.8 | 1.2 | | 14.2 | 1.7 | 7.4 | 1.6 | |  |
| [45, 65) | 51.5 | 2 | | 55.5 | 2.4 | 44.5 | 2.8 | |  |
| ≥65 | 36.7 | 1.7 | | 30.3 | 2 | 48.1 | 3 | |  |
| Gender, Female | 65 | 1.8 | | 71.8 | 2.1 | 52.9 | 3.2 | | <0.001 |
| Race/ ethnicity, % |  |  | |  |  |  |  | | 0.315 |
| Non-Hispanic white | 86.1 | 1.4 | | 87.4 | 1.4 | 83.9 | 2.3 | |  |
| Non-Hispanic black | 6.3 | 0.7 | | 5.9 | 0.8 | 7.1 | 1.2 | |  |
| Hispanic | 4.8 | 0.8 | | 4.5 | 0.8 | 5.3 | 1.3 | |  |
| Other race/ ethnicity | 2.8 | 0.9 | | 2.3 | 0.9 | 3.6 | 1.5 | |  |
| Socioeconomic Status, % |  |  | |  |  |  |  | | 0.140 |
| Low | 42.8 | 2.4 | | 36.1 | 2.6 | 56.9 | 3.7 | |  |
| Medium | 32.8 | 2.0 | | 35.5 | 2.3 | 27.2 | 3.1 | |  |
| High | 24.4 | 2.1 | | 28.4 | 2.5 | 15.9 | 3.2 | |  |
| Smoking habit, % |  |  | |  |  |  |  | | 0.018 |
| Never smoker | 49.2 | 1.7 | | 53.6 | 2.6 | 41.4 | 3.4 | |  |
| Former smoker | 36.6 | 1.8 | | 33.9 | 2.6 | 41.3 | 3.2 | |  |
| Current smoker | 14.2 | 1.4 | | 12.5 | 1.5 | 17.3 | 2.7 | |  |
| Alcohol consumption, % |  |  | |  |  |  |  | | 0.067 |
| Nondrinker | 12 | 1.4 | | 13.5 | 2 | 9.3 | 1.8 | |  |
| Light/moderate drinker | 67.5 | 1.5 | | 64.5 | 1.9 | 72.8 | 2.7 | |  |
| Heavier drinker | 20.5 | 1.5 | | 22 | 2.1 | 17.9 | 2.4 | |  |
| Physical status, % |  |  | |  |  |  |  | | 0.187 |
| Inactive | 18.5 | 1.5 | | 18.9 | 2.1 | 17.8 | 2.1 | |  |
| Insufficient | 48.9 | 2 | | 50.9 | 2.4 | 45.4 | 3.5 | |  |
| Recommended | 32.6 | 2 | | 30.2 | 2.3 | 36.7 | 3.2 | |  |
| BMI, Mean | 29.6 | 0.2 | | 29.7 | 0.3 | 29.2 | 0.4 | | 0.342 |
| BMI status (kg/m2), % |  |  | |  |  |  |  | | 0.469 |
| <25 | 25.5 | 1.6 | | 25.1 | 2.1 | 26.1 | 2.6 | |  |
| [25.0 -30) | 34.3 | 2.3 | | 33.1 | 2.5 | 36.2 | 3.1 | |  |
| ≥30 | 40.3 | 2 | | 41.7 | 2.5 | 37.7 | 3 | |  |
| Comorbidities, % |  |  | |  |  |  |  | |  |
| Hypertension | 56.6 | 1.9 | | 52.3 | 2.4 | 64.3 | 3 | | 0.002 |
| Hyperlipidemia | 70 | 2 | | 68.2 | 2.4 | 73.2 | 3.2 | | 0.165 |
| Diabetes mellitus | 16.7 | 1.6 | | 14.9 | 2 | 19.9 | 2.4 | | 0.086 |
| Cohort period, % |  |  | |  |  |  |  | | <0.001 |
| NHANES III | 12.4 | 1.1 | | 12.8 | 1.4 | 11.8 | 1.6 | |  |
| NHANES 1999-2004 | 56 | 2.9 | | 61.8 | 2.9 | 45.8 | 4.4 | |  |
| NHANES 2009-2014 | 31.6 | 3.1 | | 25.5 | 2.7 | 42.4 | 4.7 | |  |
| *Normally distributed continuous variables are described as means ± SEs; Categorical variables are presented as numbers (percentages). All estimates accounted for complex survey designs.  †The t test was used for continuous variables and the χ test for categorical variables. | | | | | | | | | |  |  |

| **Supplementary Table 8.** The results of the sensitivity analysis of original data without multiple interpolation | | | |
| --- | --- | --- | --- |
|  | Periodontal status | |  |
|  | No/ Mild periodontitis | Moderate/ Severe periodontitis | P |
| All cause* |  |  |  |
| Deaths/total (Unweighted) | 270/740 | 272/508 |  |
| Deaths/total (Weighted) | 1,994,296/4,926,496 | 2,356,381/8,716,576 |  |
| Model 1† | 1.00 [Reference] | 1.93 (1.53, 2.45) | <0.001 |
| Model 2‡ | 1.00 [Reference] | 1.31 (1.02, 1.68) | 0.034 |
| Model 3§ | 1.00 [Reference] | 1.33 (1.03, 1.71) | 0.030 |
| Model 4¶ | 1.00 [Reference] | 1.34 (1.04, 1.74) | 0.026 |
| CVD-related |  |  |  |
| Deaths/total (Unweighted) | 99/740 | 93/508 |  |
| Deaths/total (Weighted) | 573,816/4,926,496 | 723,876/8,716,576 |  |
| Model 1 | 1.00 [Reference] | 1.80 (1.25, 2.59) | 0.002 |
| Model 2 | 1.00 [Reference] | 1.14 (0.77, 1.69) | 0.513 |
| Model 3 | 1.00 [Reference] | 1.16 (0.78, 1.74) | 0.454 |
| Model 4 | 1.00 [Reference] | 1.09 (0.74, 1.61) | 0.667 |
| Cancer-related |  |  |  |
| Deaths/total (Unweighted) | 57/740 | 51/508 |  |
| Deaths/total (Weighted) | 389,829/4,926,496 | 514,286/8,716,576 |  |
| Model 1 | 1.00 [Reference] | 1.71 (1.05, 2.77) | 0.031 |
| Model 2 | 1.00 [Reference] | 1.24 (0.76, 2.03) | 0.381 |
| Model 3 | 1.00 [Reference] | 1.23 (0.74, 2.06) | 0.426 |
| Model 4 | 1.00 [Reference] | 1.45 (0.83, 2.53) | 0.198 |
| * All-cause mortality used Cox proportional hazards model, and cause-specific mortality used competing risk model.  † Model 1 was univariate analysis.  ‡ Model 2 included age (30-44, 45-64 or ≥65 years old), gender, race/ethnicity (non-Hispanic white, non-Hispanic black, Hispanic or other races), SES (Socioeconomic Status, low, middle, high).  § Model 3 additionally included smoking habit (never smokers, former or current smokers), alcohol consumption (nondrinker, heavier drinker, or light/ moderate drinker), [physical activity](https://www.so.com/link?m=b+1HoIQW0UKZm8qFAWepRClkrqA6j1l3Q2WRNa0GtuJOspq+PCyCcZSh+ozoV3S6pIk1EvQ0lmsleWi7eNLbwCxevJO4PhfpV7mYD1UegNClNGKEskLTr8I3mj++dV2rbRhtxTvPLo+4=) status (inactive, insufficient, recommended) and BMI (body measure index, normal (≤24.9 [kg/m2]), overweight (25.0-29.9 [kg/m2]), and obesity (≥30.0 [kg/m2]) based on Model 2.  ¶ Model 4 was further adjusted for HTN status (hypertension, yes or no) , HPL (hyperlipidemia, yes or no),diabetes status (yes or no) and cohort period based on Model 3. | | | |

| **Supplementary Table 9.** Baseline characteristics of participants of complete data with osteoarthritis according to periodontal status | | | | | | | | | |
| --- | --- | --- | --- | --- | --- | --- | --- | --- | --- |
|  |  | |  | Periodontal status | | | | |  |
|  | Over all | | | No/ Mild periodontitis | | Moderate/ Severe periodontitis | | |  |
| Characteristics | Mean/ %* | | SE* | Mean/ % | SE | Mean/ % | | SE | P† |
| No.(Unweighted) | 1,081 | | | 631 | | 450 | | |  |
| No.(Weighted) | 12,031,132 | | | 4,319,149 | | 7,711,983 | | |  |
| Age (years), mean | 59.8 | 0.4 | | 58 | 0.6 | 63 | 0.8 | | <0.001 |
| Age status, % |  |  | |  |  |  |  | | <0.001 |
| <45 | 12 | 1.3 | | 14.5 | 1.9 | 7.6 | 1.8 | |  |
| [45, 65) | 51.1 | 2.2 | | 55 | 2.7 | 44.1 | 3 | |  |
| ≥65 | 36.9 | 1.7 | | 30.6 | 2.1 | 48.3 | 2.9 | |  |
| Gender, Female | 64.7 | 2 | | 71.3 | 2.3 | 53 | 3.5 | | <0.001 |
| Race/ ethnicity, % |  |  | |  |  |  |  | | 0.234 |
| Non-Hispanic white | 86.8 | 1.4 | | 88.3 | 1.4 | 84 | 2.4 | |  |
| Non-Hispanic black | 5.9 | 0.7 | | 5.1 | 0.7 | 7.4 | 1.2 | |  |
| Hispanic | 4.7 | 0.8 | | 4.2 | 0.8 | 5.6 | 1.5 | |  |
| Other race/ ethnicity | 2.6 | 0.9 | | 2.3 | 0.9 | 3 | 1.4 | |  |
| Socioeconomic Status, % |  |  | |  |  |  |  | | 0.141 |
| Low | 11.3 | 1.4 | | 10 | 1.3 | 13.6 | 2.5 | |  |
| Medium | 56.3 | 2.1 | | 55.3 | 2.6 | 58 | 3.5 | |  |
| High | 32.4 | 2.2 | | 34.7 | 2.4 | 28.4 | 3.8 | |  |
| Smoking habit, % |  |  | |  |  |  |  | | 0.017 |
| Never smoker | 49.4 | 1.8 | | 53.8 | 2.5 | 41.6 | 4 | |  |
| Former smoker | 37 | 1.9 | | 35 | 2.7 | 40.6 | 3.8 | |  |
| Current smoker | 13.5 | 1.5 | | 11.2 | 1.3 | 17.7 | 3 | |  |
| Alcohol consumption, % |  |  | |  |  |  |  | | 0.061 |
| Nondrinker | 12.4 | 1.5 | | 13.8 | 2 | 10 | 2 | |  |
| Light/moderate drinker | 67.8 | 1.7 | | 64.7 | 2.2 | 73.4 | 2.6 | |  |
| Heavier drinker | 19.8 | 1.7 | | 21.5 | 2.3 | 16.6 | 2.3 | |  |
| Physical status, % |  |  | |  |  |  |  | | 0.210 |
| Inactive | 17.6 | 1.6 | | 17.5 | 2.1 | 17.8 | 2.5 | |  |
| Insufficient | 50.4 | 2 | | 52.7 | 2.5 | 46.3 | 3.7 | |  |
| Recommended | 32 | 2 | | 29.8 | 2.3 | 35.9 | 3.2 | |  |
| BMI, Mean | 29.5 | 0.2 | | 29.7 | 0.4 | 29.2 | 0.4 | | 0.393 |
| BMI status (kg/m2), % |  |  | |  |  |  |  | | 0.567 |
| <25 | 25.4 | 1.6 | | 25 | 2.2 | 26.3 | 2.7 | |  |
| [25.0 -30) | 34.3 | 2.4 | | 33.5 | 2.7 | 35.8 | 3.3 | |  |
| ≥30 | 40.3 | 1.8 | | 41.6 | 2.6 | 37.9 | 2.8 | |  |
| Comorbidities, % |  |  | |  |  |  |  | |  |
| Hypertension | 57.6 | 2 | | 53.1 | 2.5 | 65.8 | 3.3 | | 0.002 |
| Hyperlipidemia | 69.5 | 2.1 | | 67.7 | 2.5 | 72.8 | 3.6 | | 0.219 |
| Diabetes mellitus | 16.8 | 1.6 | | 14.9 | 2 | 20.2 | 2.6 | | 0.091 |
| Cohort period, % |  |  | |  |  |  |  | | <0.001 |
| NHANES III | 12.3 | 1.2 | | 12.6 | 1.6 | 11.7 | 1.7 | |  |
| NHANES 1999-2004 | 56.3 | 3.1 | | 62.3 | 3.3 | 45.5 | 4.6 | |  |
| NHANES 2009-2014 | 31.5 | 3.2 | | 25.1 | 3 | 42.9 | 4.8 | |  |
| *Normally distributed continuous variables are described as means ± SEs; Categorical variables are presented as numbers (percentages). All estimates accounted for complex survey designs.  †The t test was used for continuous variables and the χ test for categorical variables. | | | | | | | | | |

| **Supplementary Table 10.** The results of the sensitivity analysis of complete data without multiple interpolation | | | |
| --- | --- | --- | --- |
|  | Periodontal status | |  |
|  | No/ Mild periodontitis | Moderate/ Severe periodontitis | P |
| All cause* |  |  |  |
| Deaths/total (Unweighted) | 169/558 | 158/340 |  |
| Deaths/total (Weighted) | 1,116,540/3,436,951 | 1,535,650/6,776,694 |  |
| Model 1† | 1.00 [Reference] | 1.92 (1.44, 2.57) | <0.001 |
| Model 2‡ | 1.00 [Reference] | 1.28 (0.94, 1.75) | 0.120 |
| Model 3§ | 1.00 [Reference] | 1.26 (0.91, 1.76) | 0.162 |
| Model 4¶ | 1.00 [Reference] | 1.25 (0.89, 1.76) | 0.196 |
| CVD-related |  |  |  |
| Deaths/total (Unweighted) | 55/558 | 55/340 |  |
| Deaths/total (Weighted) | 347,564/3,436,951 | 402,068/6,776,694 |  |
| Model 1 | 1.00 [Reference] | 2.28 (1.37, 3.80) | 0.001 |
| Model 2 | 1.00 [Reference] | 1.44 (0.81, 2.55) | 0.214 |
| Model 3 | 1.00 [Reference] | 1.46 (0.81, 2.64) | 0.208 |
| Model 4 | 1.00 [Reference] | 1.14 (0.61, 2.15) | 0.685 |
| Cancer-related |  |  |  |
| Deaths/total (Unweighted) | 39/558 | 30/340 |  |
| Deaths/total (Weighted) | 201,245/3,436,951 | 345,018/6,776,694 |  |
| Model 1 | 1.00 [Reference] | 1.48 (0.76, 2.89) | 0.252 |
| Model 2 | 1.00 [Reference] | 1.11 (0.57, 2.15) | 0.757 |
| Model 3 | 1.00 [Reference] | 1.10 (0.54, 2.26) | 0.795 |
| Model 4 | 1.00 [Reference] | 1.34 (0.58, 3.11) | 0.489 |
| * All-cause mortality used Cox proportional hazards model, and cause-specific mortality used competing risk model.  † Model 1 was univariate analysis.  ‡ Model 2 included age (30-44, 45-64 or ≥65 years old), gender, race/ethnicity (non-Hispanic white, non-Hispanic black, Hispanic or other races), SES (Socioeconomic Status, low, middle, high) .  § Model 3 additionally included smoking habit (never smokers, former or current smokers), alcohol consumption (nondrinker, heavier drinker, or light/ moderate drinker), [physical activity](https://www.so.com/link?m=b+1HoIQW0UKZm8qFAWepRClkrqA6j1l3Q2WRNa0GtuJOspq+PCyCcZSh+ozoV3S6pIk1EvQ0lmsleWi7eNLbwCxevJO4PhfpV7mYD1UegNClNGKEskLTr8I3mj++dV2rbRhtxTvPLo+4=) status (inactive, insufficient, recommended) and BMI (body measure index, normal (≤24.9 [kg/m2]), overweight (25.0-29.9 [kg/m2]), and obesity (≥30.0 [kg/m2]) based on Model 2.  ¶ Model 4 was further adjusted for HTN status (hypertension, yes or no) , HPL (hyperlipidemia, yes or no),diabetes status (yes or no) and cohort period based on Model 3. | | | |

| **Supplementary Table 11.** The results of the sensitivity analysis of participants only with major osteoarthritis | | | |
| --- | --- | --- | --- |
|  | Periodontal status | |  |
|  | No/ Mild periodontitis | Moderate/ Severe periodontitis | P |
| All cause* |  |  |  |
| Deaths/total (Unweighted) | 223/631 | 240/450 |  |
| Deaths/total (Weighted) | 1,739,071/4,319,149 | 1,991,062/7,711,983 |  |
| Model 1† | 1.00 [Reference] | 2.06 (1.60, 2.67) | <0.001 |
| Model 2‡ | 1.00 [Reference] | 1.45 (1.11, 1.88) | 0.006 |
| Model 3§ | 1.00 [Reference] | 1.42 (1.08, 1.86) | 0.011 |
| Model 4¶ | 1.00 [Reference] | 1.43 (1.11, 1.83) | 0.006 |
| CVD-related |  |  |  |
| Deaths/total (Unweighted) | 86/631 | 89/450 |  |
| Deaths/total (Weighted) | 545,724/4,319,149 | 623,684/7,711,983 |  |
| Model 1 | 1.00 [Reference] | 2.04 (1.41, 2.97) | <0.001 |
| Model 2 | 1.00 [Reference] | 1.33 (0.88, 1.99) | 0.173 |
| Model 3 | 1.00 [Reference] | 1.32 (0.88, 1.98) | 0.184 |
| Model 4 | 1.00 [Reference] | 1.20 (0.82, 1.76) | 0.353 |
| Cancer-related |  |  |  |
| Deaths/total (Unweighted) | 45/631 | 38/450 |  |
| Deaths/total (Weighted) | 252,258/4,319,149 | 408,947/7,711,983 |  |
| Model 1 | 1.00 [Reference] | 1.43 (0.80, 2.56) | 0.231 |
| Model 2 | 1.00 [Reference] | 1.07 (0.59, 1.92) | 0.822 |
| Model 3 | 1.00 [Reference] | 1.04 (0.55, 1.95) | 0.901 |
| Model 4 | 1.00 [Reference] | 1.14 (0.59, 2.19) | 0.700 |
| * All-cause mortality used Cox proportional hazards model, and cause-specific mortality used competing risk model.  † Model 1 was univariate analysis.  ‡ Model 2 included age (30-44, 45-64 or ≥65 years old), gender, race/ethnicity (non-Hispanic white, non-Hispanic black, Hispanic or other races), SES (Socioeconomic Status, low, middle, high) .  § Model 3 additionally included smoking habit (never smokers, former or current smokers), alcohol consumption (nondrinker, heavier drinker, or light/ moderate drinker), [physical activity](https://www.so.com/link?m=b+1HoIQW0UKZm8qFAWepRClkrqA6j1l3Q2WRNa0GtuJOspq+PCyCcZSh+ozoV3S6pIk1EvQ0lmsleWi7eNLbwCxevJO4PhfpV7mYD1UegNClNGKEskLTr8I3mj++dV2rbRhtxTvPLo+4=) status (inactive, insufficient, recommended) and BMI status (body measure index, normal (≤24.9 [kg/m2]), overweight (25.0-29.9 [kg/m2]), and obesity (≥30.0 [kg/m2]) based on Model 2.  ¶ Model 4 was further adjusted for HTN status (hypertension, yes or no), HPL (hyperlipidemia, yes or no), and diabetes status (yes or no) based on Model 3. | | | |

1. Supplementary Figures:


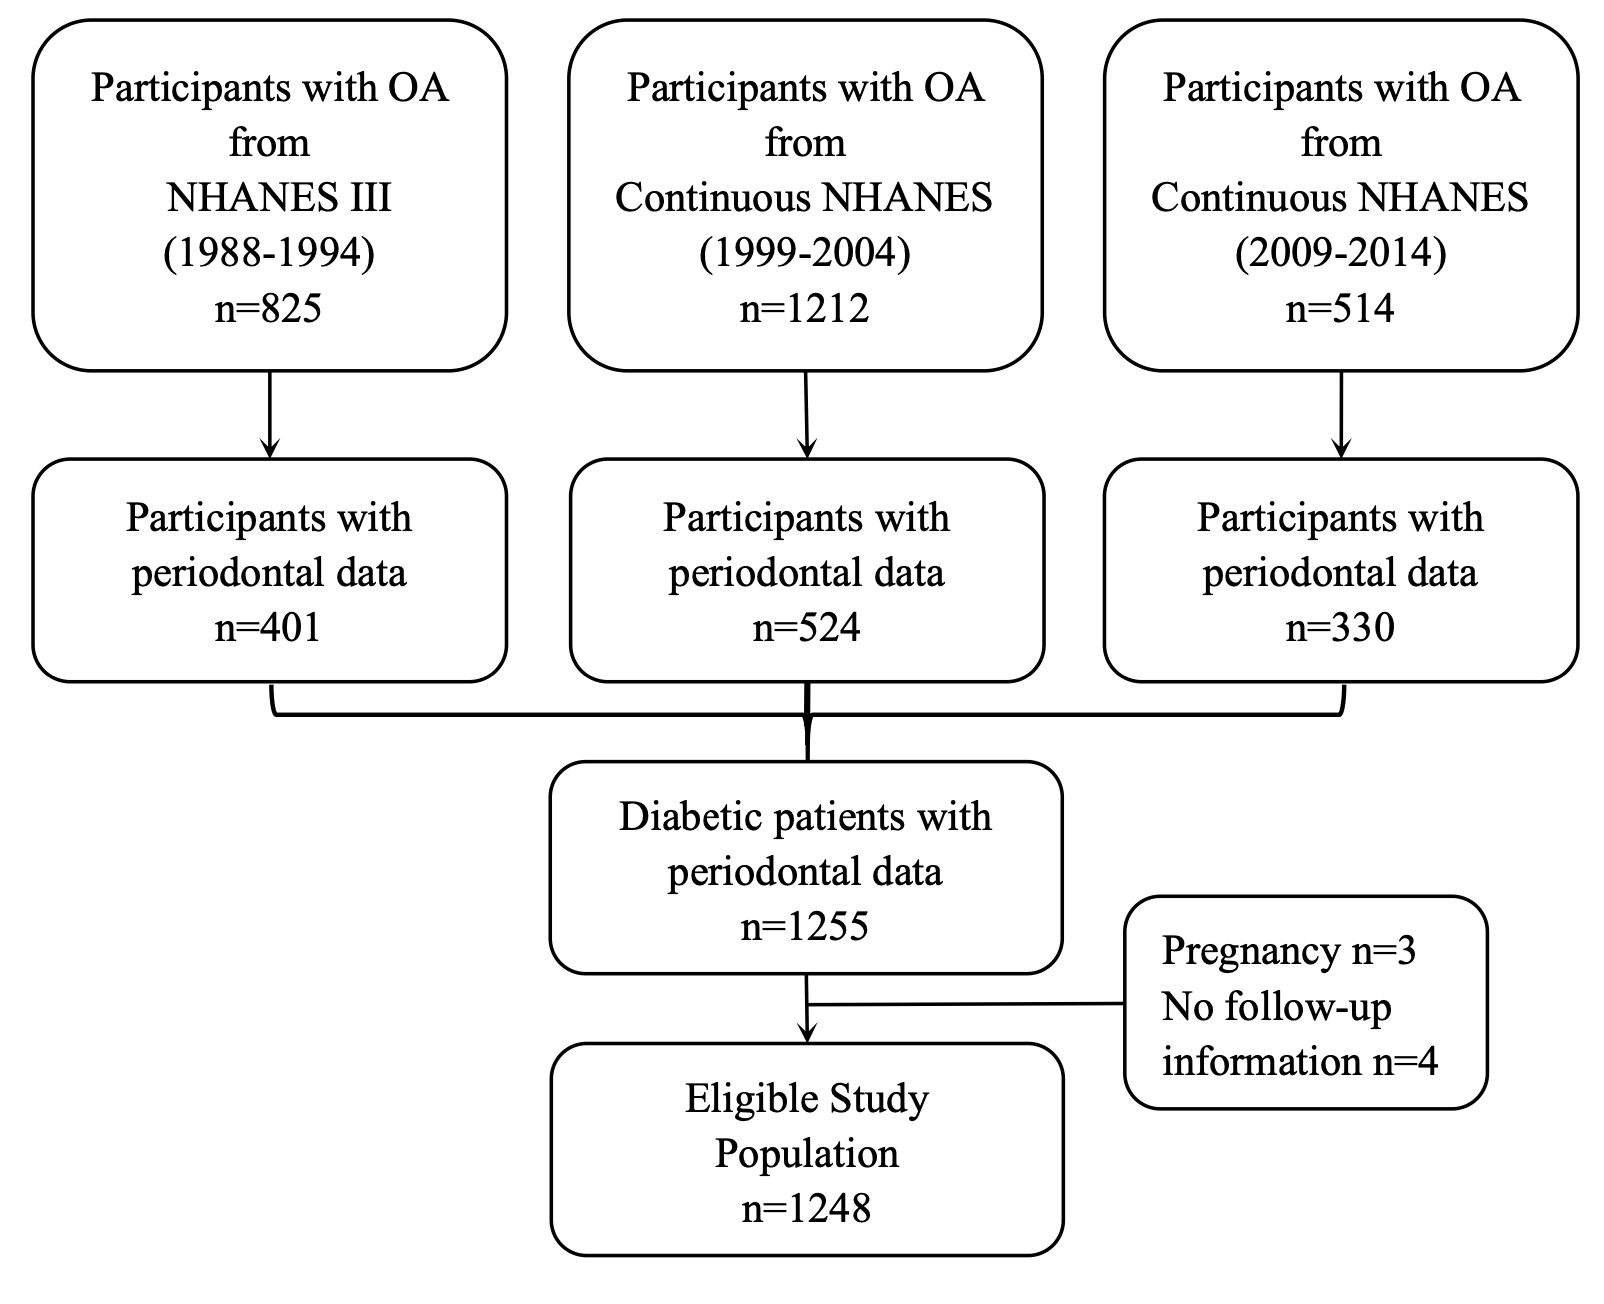


**Supplementary Fig. 1.** Flowchart of the study participants


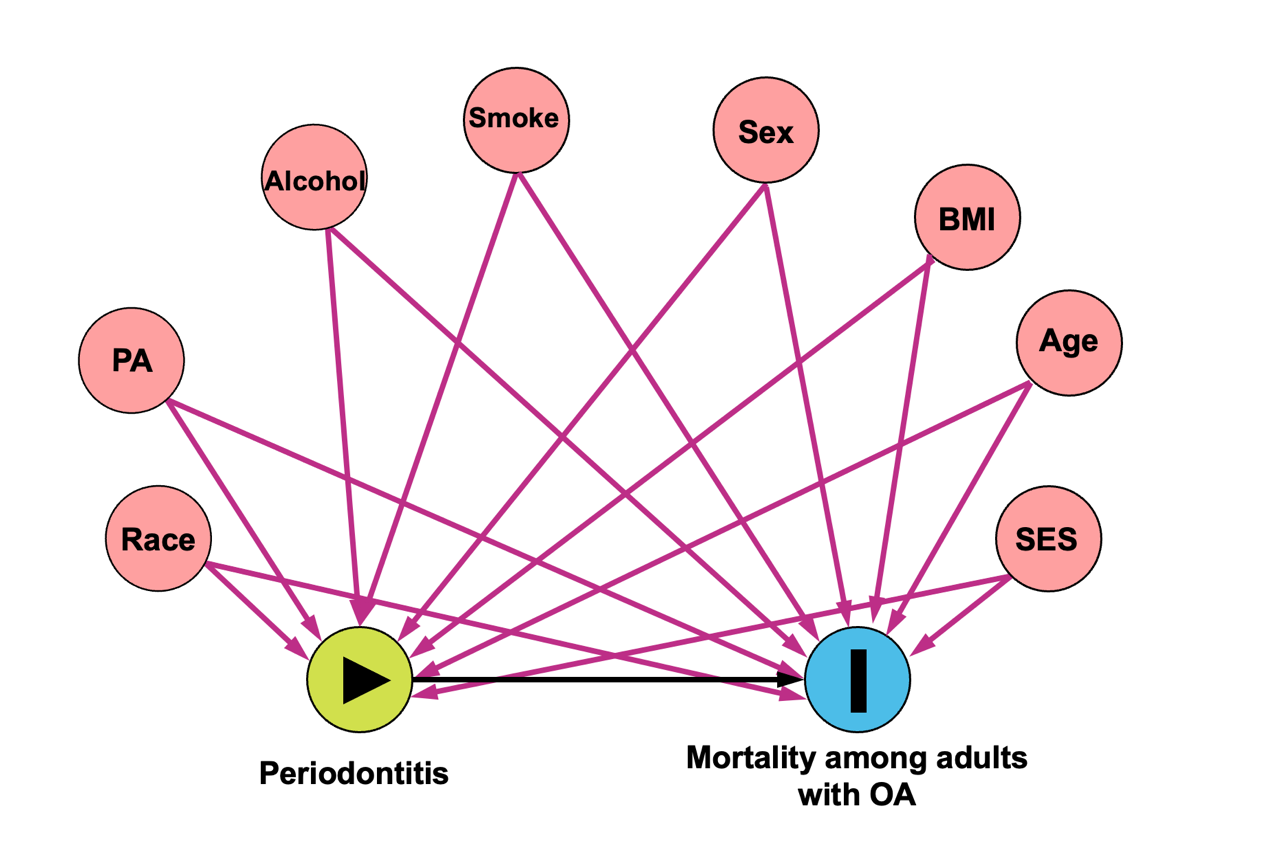


**Supplementary Fig. 2.** The results of directed acyclic graphs (DAGs). Nine covariates were selected into the minimal sufficient adjustment set. Including race / ethnicity, physical activity status (PA), alcohol consumption (Alcohol), smoking habit (Smoke), gender, body mass index (BMI), age, and socioeconomic status (SES).


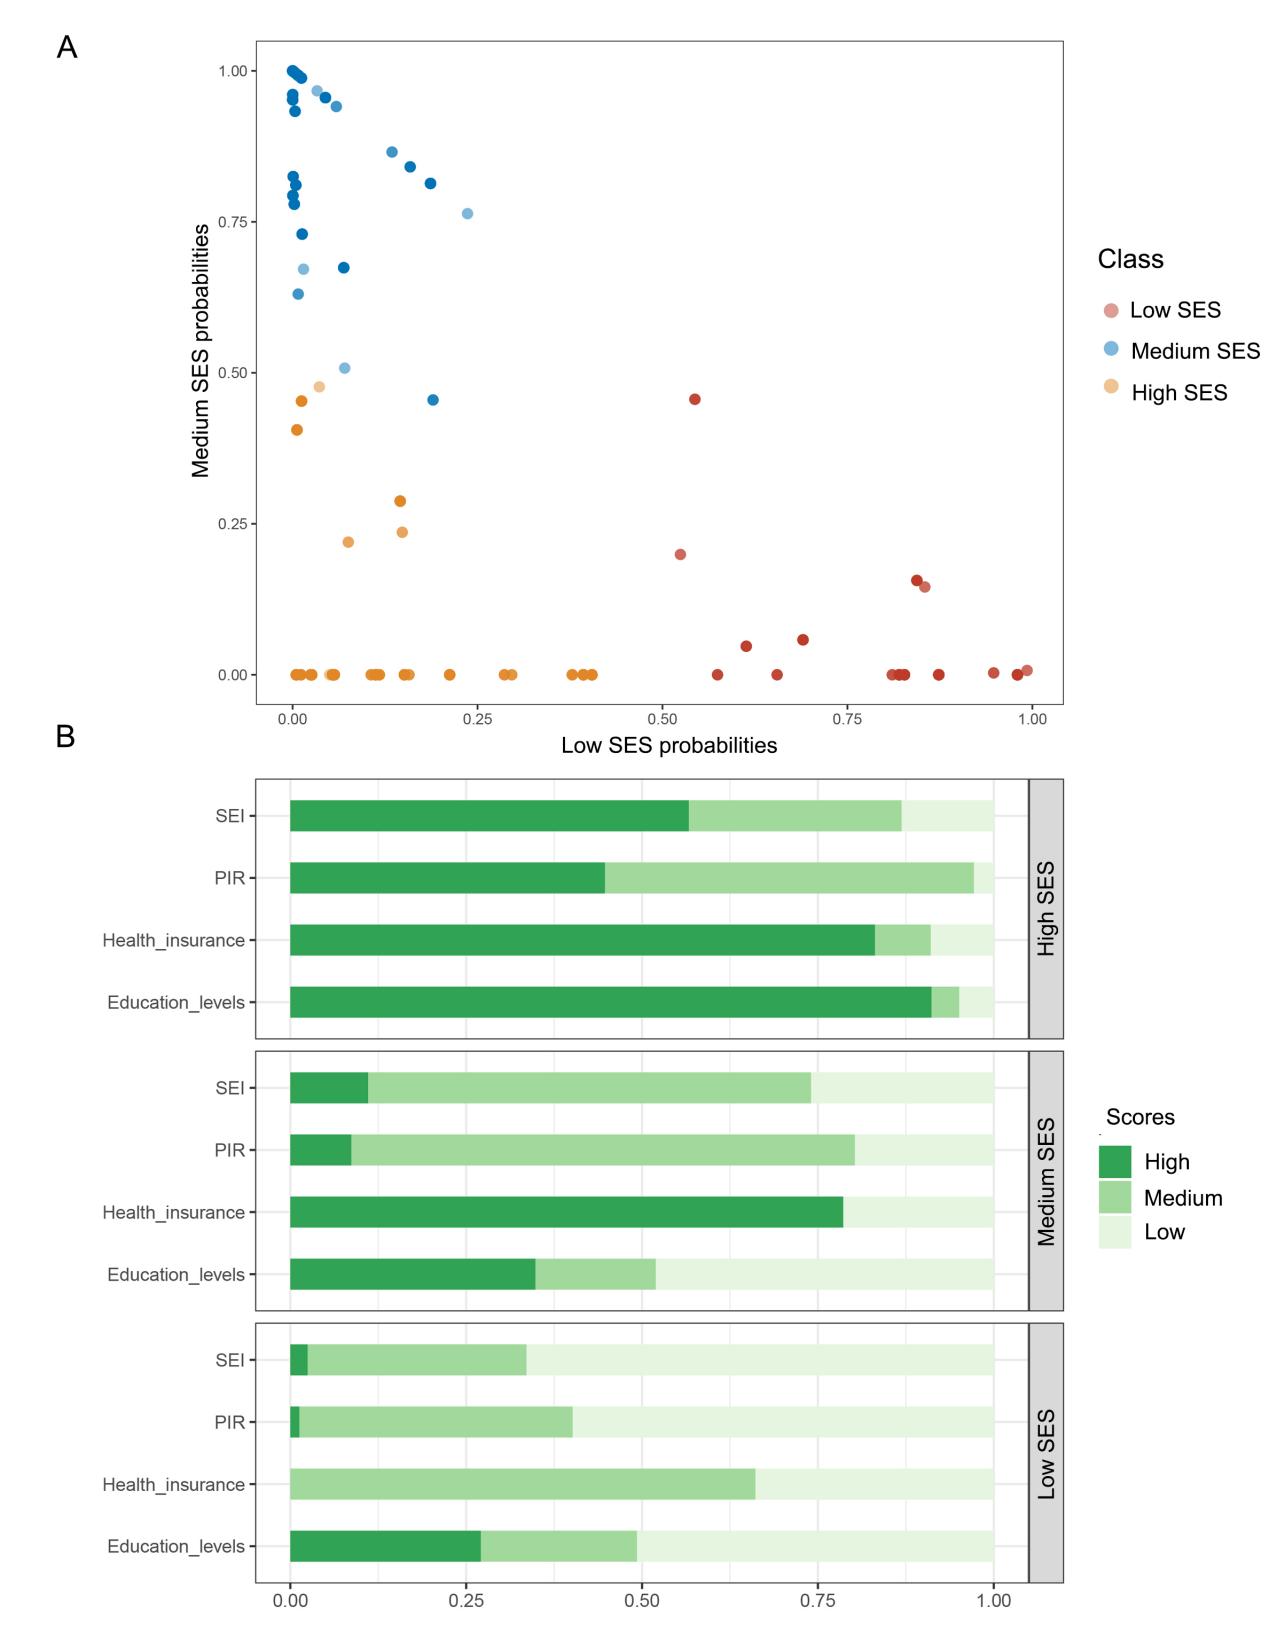


**Supplementary Fig. 3.** Details of the socioeconomic status (SES) classification using latent class analysis. A: Probability distribution of SES triple classification; B: Distribution of the characteristics of SES.

Feature definition: High: socioeconomic index (SEI): upper, Poverty Income Ratio (PIR): ≥4.00, insurance: private, education: college graduation or higher; Medium: SEI: lower, PIR: 1.00-3.99, insurance: public only, education: high school graduation or equivalent; Low: SEI: unemployment, PIR: <1.00, insurance: none, education: no high school graduation.
