# Supplementary material for: Periodontitis and the risk of all-cause and cause-specific mortality among individuals with osteoarthritis in U.S.: A population-based cohort study
Source: Research Square preprint supplement (doi:10.21203/rs.3.rs-6746901/v1), 2025-07-18
Supplement: Supplementary file 2 [file 9d9d6f943ab9614bec13f723.docx]

**Supplementary File 1**

**Periodontitis and the risk of all-cause and cause-specific mortality among individuals with osteoarthritis in U.S.: A population-based cohort study**

**Table of Contents**

**Supplementary methods**

**1. Assessment of oral examination..................................................................................................................5**

**2. Ascertainment of mortality.......................................................................................................................6**

**3. Assessment of covariates.....................................................................................................................7**

**4. Reference......................................................................................................................9**

***Supplementary methods***

1. Assessment of oral examination

Periodontal evaluations were conducted by a sole examiner at the mobile examination units of the National Health and Nutrition Examination Survey (NHANES)[1]. The periodontal probe used had markings at intervals of 2, 4, 6, 8, 10, and 12 millimeters, with the examiner rounding each measurement down to the nearest whole millimeter. The type of probe differed across survey periods: the National Institute of Dental Research (NIDR) Probe was utilized for NHANES III, while the Perioprobe was implemented for NHANES 1999 to 2002 [2, 3].

During NHANES III (1988-1994) and the continuous NHANES cycles (1999-2004), participants were randomly selected for periodontal examination in one maxillary and one mandibular quadrant. In the 2009-2014 cycles, the scope of examinations was expanded to include all four quadrants. Between 1988-1994 and 1999-2000, clinical attachment loss (CAL) and probing depth (PPD) were measured at two sites (mesial buccal and mid buccal). From 2001-2004, the protocol was extended to three sites (mesial buccal, distal buccal, and mid buccal). By 2009-2014, it was further broadened to record measurements at six sites (buccal, distal buccal, mid buccal, mesial lingual, distal lingual, and mid lingual).

To maintain consistency in diagnostic criteria, we modified the more recent surveys to match those with less detailed information. For all participants, periodontal examination data was randomly drawn from one maxillary and one mandibular quadrant. Only the mesial buccal and mid buccal sites were considered for subsequent analyses.

In line with previous studies, periodontitis was classified using the criteria set by the Centers for Disease Control and Prevention (CDC) and the American Academy of Periodontology (AAP) for partial-mouth periodontal examination (PMPE)[4]. Participants were randomly selected for periodontal examination in one maxillary quadrant and one mandibular quadrant for a consistent criteria. The measurement sites were defined as the mesial buccal and mid buccal sites[4, 5]. Additionally, we categorized patients with moderate to severe periodontitis as the exposed group and those with no or mild periodontitis as the unexposed group to mitigate the risk of bias from the potential over-prevalence of mild periodontitis in the population[4, 6]. Mild, severe, and moderate periodontitis were defined as follows[2, 3]:

Mild periodontitis: ≥ 1 interproximal site with ≥ 3 mm CAL, or ≥ 1 interproximal site with ≥ 4 mm PPD.

Moderate periodontitis: ≥ 1 interproximal site with ≥ 4 mm CAL, or ≥ 1 interproximal site with ≥ 5 mm PPD.

Severe periodontitis: ≥ 1 inter-proximal site with ≥ 5 mm PPD, or ≥ 1 interproximal site with CAL ≥ 6 mm (on the same site or different sites).

1. Ascertainment of mortality

Mortality status was identified using the 2019 Public-Use Linked Mortality Files provided by the CDC’s National Center for Health Statistics. The baseline for participants was set at the time of their periodontal exams. Person-years were calculated from this baseline until either death, loss to follow-up, or December 31, 2019, whichever occurred first. Cause-specific mortality was determined based on the International Classification of Diseases, Tenth Revision (ICD-10). ICD-10 codes were used to classify underlying causes of death, such as cancer (codes C00-C97) and cardiovascular disease (CVD) (codes I00–I09, I11, I13, I20–I51, I60–I69), including rheumatic heart diseases, hypertensive heart and renal disorders, ischemic heart disease, heart failure, and cerebrovascular conditions[7, 8].

1. Assessment of covariates

The potential relationships between exposure, outcomes, and covariates were illustrated using directed acyclic graphs (DAGs)[9, 10] (**Supplementary Figure 2**). Subsequently, the primary DAG was employed to determine the minimal sufficient adjustment set, which included nine covariates: age, gender, race/ethnicity, socioeconomic status (SES), smoking habit, alcohol consumption, physical activity, and obesity (body mass index, BMI). Additionally, based on the covariates identified from the DAGs, further adjustments were made for comorbidities (hypertension, hypercholesterolemia, diabetes) and cohort periods. In total, data on age, gender, race/ethnicity, SES, smoking habits, alcohol consumption, physical activity, BMI, hypertension, hyperlipidemia, diabetes, and cohort periods were collected as covariates.

Age was categorized into three groups: 30-44 years, 45-64 years, and ≥65 years. Gender was self-reported and classified as male or female. Race/ethnicity was classified into non-Hispanic white, non-Hispanic black, Hispanic, and other[11]. Income, education level, occupation, and insurance were combined to form socioeconomic status (SES) to provide a comprehensive measure of participants' economic and social standing. Each SES factor was subsequently divided into three categories[8]. Education level was divided into no high school graduation, high school graduation or equivalent, and college graduation or higher. Family income was defined by the federal Poverty Income Ratio and categorized into <1.00, 1.00-3.99, and ≥4.00[8]. Health insurance was categorized into private (including any private health insurance or single-service plan), public only (including Medicare, Medicaid, military healthcare, or other government programs), and none. Occupation was classified based on the socioeconomic index: upper (≥50), lower (<50, including retirees and students), and unemployment. Latent class analysis was employed to generate SES, which was ultimately divided into three mutually exclusive latent classes: high, medium, and low. **Supplementary Figure 3 and Supplementary Table 2** provides details of the SES classification. Smoking habit included current smokers (currently smoking, and previously smoked ≥100 cigarettes during lifetime), former smokers (previous smoked ≥100 cigarettes during lifetime, but no longer smoking), and never smokers (previously smoked <100 cigarettes during lifetime) [12]. Alcohol consumption status included nondrinkers (<12 alcoholic drinks consumed during lifetime), heavier drinkers (average ≥2 alcoholic drinks/day for males or≥1 alcoholic drink/day for females), and light/moderate drinkers (≥12 alcoholic drinks consumed during lifetime but average <2 alcoholic drinks/day for males or <1 alcoholic drink/day for females) [7]. Nutritional status was classified by BMI into normal (≤24.9 kg/m²), overweight (25.0-29.9 kg/m²), and obesity (≥30.0 kg/m²) (≥30.0 kg/m2) [12]. The diagnostic criteria for hypertension were defined as an average systolic blood pressure of ≥140 mm Hg or diastolic blood pressure ≥90 mm Hg, self-reported doctor-diagnosed hypertension, or the use of antihypertensive medications. Hyperlipidemia was defined as a serum cholesterol level ≥200 mg/dL, doctor-diagnosed hyperlipidemia, or the use of cholesterol control measures. Diabetes was diagnosed based on self-reported physician-diagnosed diabetes, the use of insulin or oral hypoglycemic agents, and laboratory tests (fasting blood glucose ≥7.0 mmol/L, random blood glucose ≥11.1 mmol/L from an oral glucose tolerance test, or HbA1c ≥6.5% [48 mmol/mol])[2]; Detailed descriptions of the methods used for covariate measurement are available on the NHANES website.

1. Reference

1. Eke, P.I., W.S. Borgnakke, and R.J. Genco, *Recent epidemiologic trends in periodontitis in the USA.* Periodontology 2000, 2020. **82**(1): p. 257-267.

2. Li, W.Q., et al., *Periodontitis and the risk of all-cause and cause-specific mortality among US adults with diabetes: A population-based cohort study.* Journal of Clinical Periodontology, 2024. **51**(3): p. 288-298.

3. Li, W.Q., et al., *Associations of periodontitis with risk of all-cause and cause-specific mortality among us adults with chronic kidney disease.* Journal of Dentistry, 2023. **138**.

4. Tran, D.T., et al., *Assessment of partial-mouth periodontal examination protocols for periodontitis surveillance.* J Clin Periodontol, 2014. **41**(9): p. 846-52.

5. Eke, P.I., W.S. Borgnakke, and R.J. Genco, *Recent epidemiologic trends in periodontitis in the USA.* Periodontol 2000, 2020. **82**(1): p. 257-267.

6. Page, R.C. and P.I. Eke, *Case Definitions for Use in Population-Based Surveillance of Periodontitis.* Journal of Periodontology, 2007. **78**(7S): p. 1387-1399.

7. Hicks, C.W., et al., *Peripheral Neuropathy and All-Cause and Cardiovascular Mortality in US Adults A Prospective Cohort Study.* Annals of Internal Medicine, 2021. **174**(2): p. 167-+.

8. Zhang, Y.B., et al., *Associations of healthy lifestyle and socioeconomic status with mortality and incident cardiovascular disease: two prospective cohort studies.* Bmj-British Medical Journal, 2021. **372**.

9. Wang, L., et al., *Trends in Consumption of Ultraprocessed Foods Among US Youths Aged 2-19 Years, 1999-2018.* Jama-Journal of the American Medical Association, 2021. **326**(6): p. 519-530.

10. Ramirez, F.D., et al., *Association of Atopic Dermatitis With Sleep Quality in Children.* Jama Pediatrics, 2019. **173**(5).

11. Banach, M., et al., *Association between phenotypic familial hypercholesterolaemia and telomere length in US adults: results from a multi-ethnic survey.* European Heart Journal, 2018. **39**(40): p. 3635-3640.

12. Chen, F., et al., *Association Among Dietary Supplement Use, Nutrient Intake, and Mortality Among US Adults A Cohort Study.* Annals of Internal Medicine, 2019. **170**(9): p. 604-+.
